# Supplementary material
Source: ML conference proceedings conference paper supplement (https://openreview.net/forum?id=BCg4lD8ice5)

LCE(x) in Bin 5/15 (Best Global Calibration)

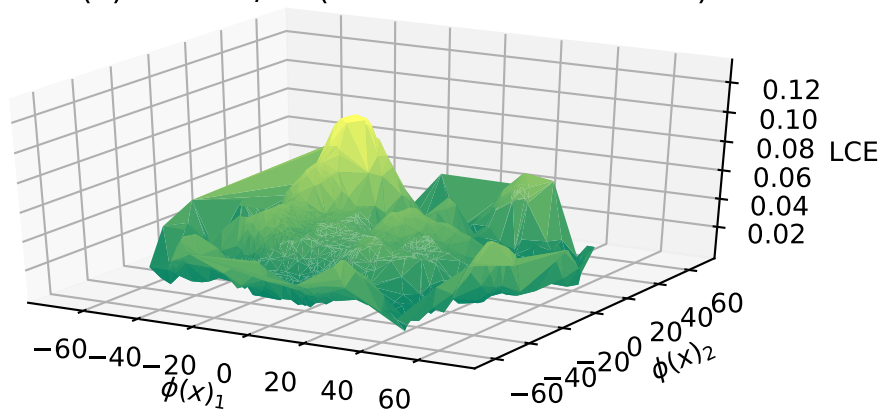

CDF of LCE(x) in Bin 5/15 (Best Global Calibration)

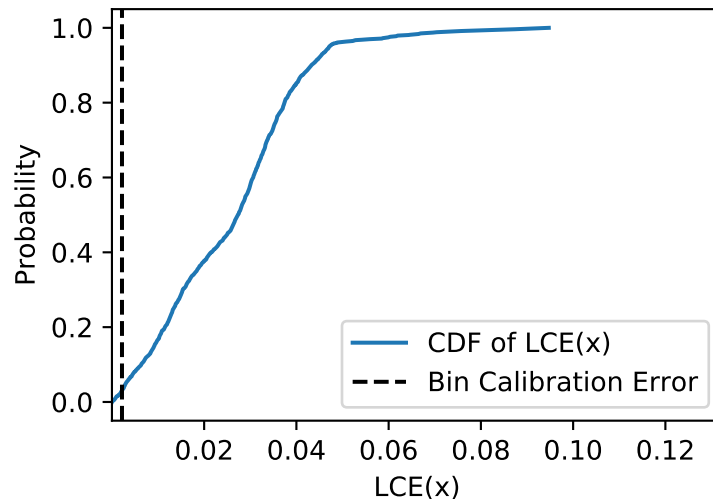

LCE(x) in Bin 12/15 (Worst Global Calibration)

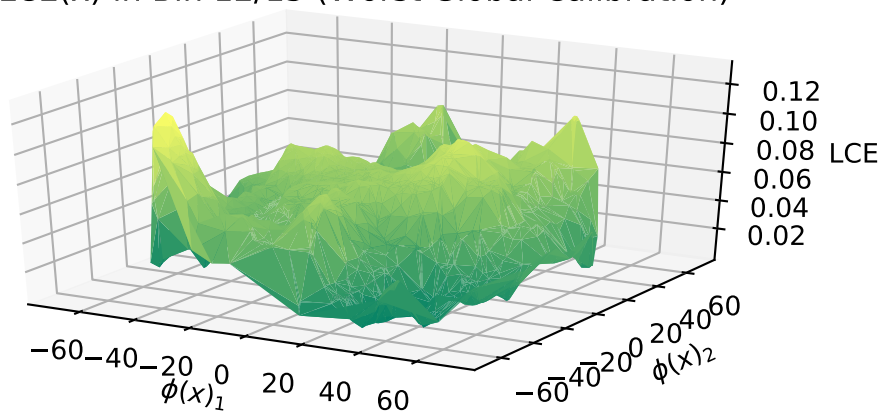

CDF of LCE(x) in Bin 12/15 (Worst Global Calibration)

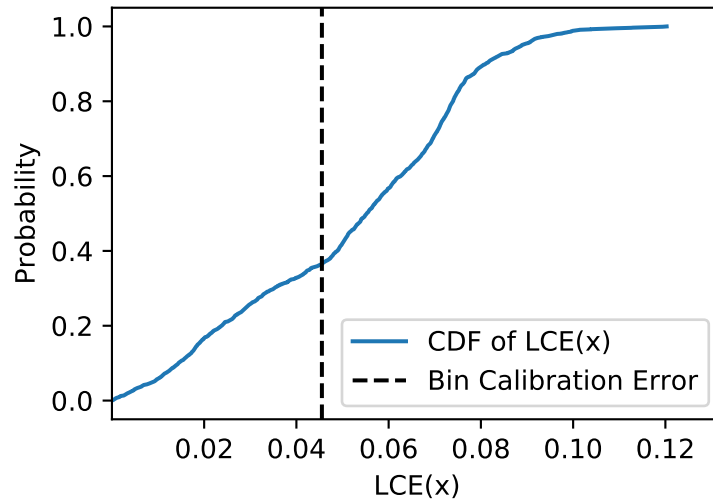

Supplement: supplementary_material [file attachment]
