# Supplementary material
Source: ML conference proceedings conference paper supplement (https://openreview.net/forum?id=BCg4lD8ice5)

LCE(x) in Bin 11/15 (Before Applying LoRe)

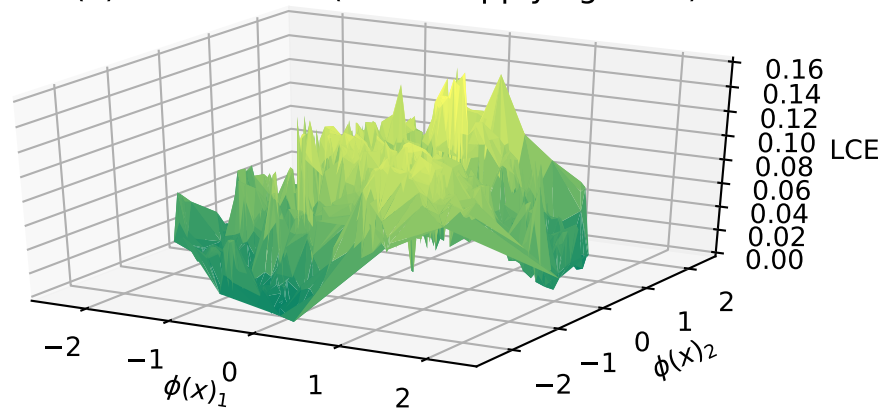

CDF of LCE(x) in Bin 11/15 (Before Applying LoRe)

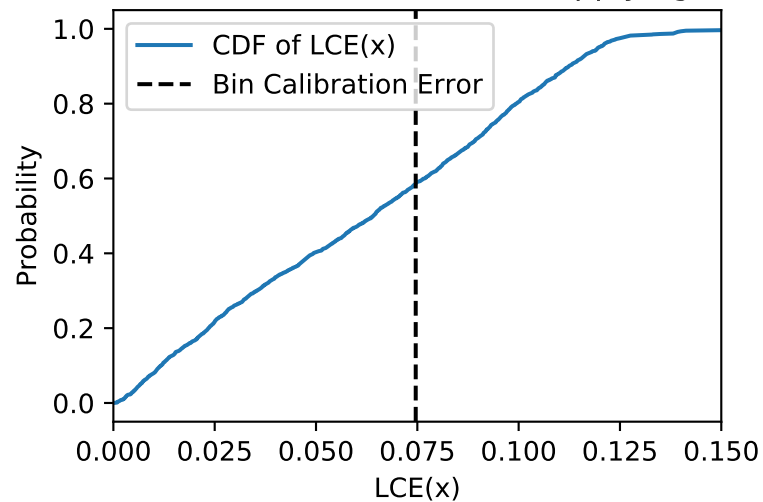

LCE(x) in Bin 11/15 (After Applying LoRe)

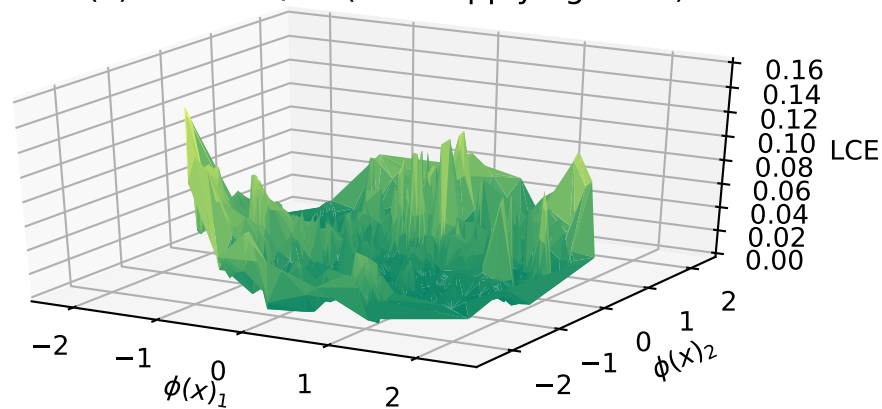

CDF of LCE(x) in Bin 11/15 (After Applying LoRe)

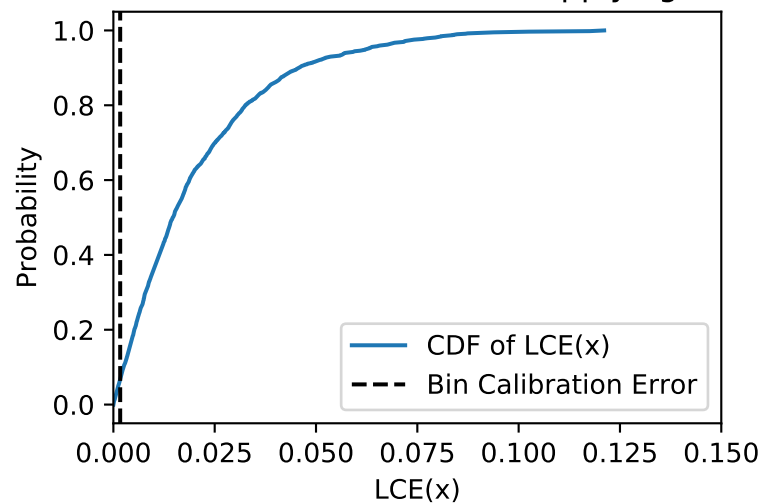

Supplement: supplementary_material [file attachment]
